# Supplementary material for: Platinum-decorated carbon nanoparticle/polyaniline hybrid paste for flexible wideband dipole tag-antenna application
Source: Royal Society of Chemistry journal article supplement (doi:10.1039/c4ta07064j), 2015-01-01
Supplement: c4ta07064j1.pdf [file c4ta07064j1.pdf]

Electronic Supplementary Information (ESI) for

## **Platinum-Decorated Carbon Nanoparticle/Polyaniline Hybrid Paste for Flexible Wideband Dipole Tag-Antenna Application**

Jun Seop Lee<sup>‡</sup>, Minkyu Kim<sup>‡</sup>, Jungkyun Oh, Jihoo Kim, Sunghun Cho, Jaemoon Jun, and Jyongsik Jang\*

*School of Chemical and Biological Engineering, College of Engineering, Seoul National University (SNU), 599 Gwanangno, Gwanak-gu, Seoul, 151-742 (Korea). Fax: +82-2-888-7295; Tel: 82-2-880-8348; e-mail: [jsjang@plaza.snu.ac.kr](mailto:jsjang@plaza.snu.ac.kr)*

<sup>‡</sup> These authors contributed equally to this work.

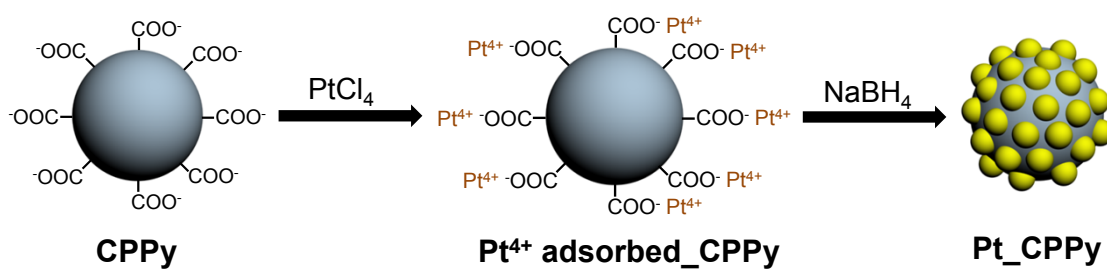

**Figure S1.** Schematic illustration of the formation of Pt particles on the CPPy surface.

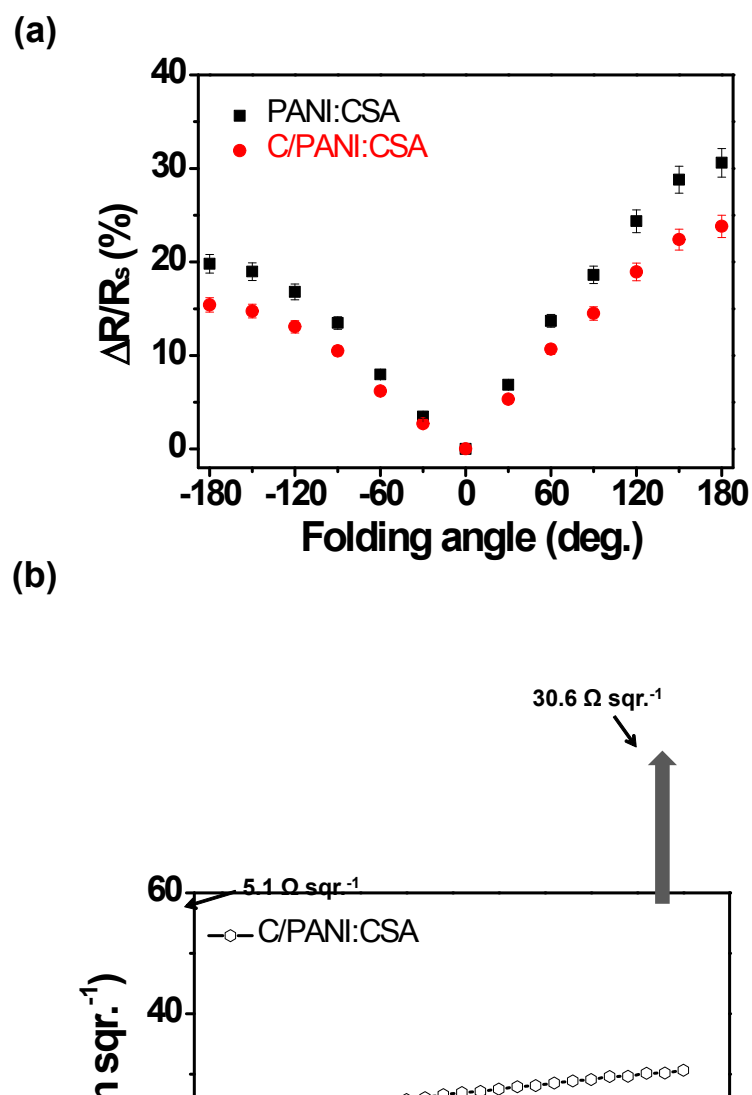

**Figure S2.** (a) Surface resistance changes of PANI:CSA (black) and C/PANI:CSA (red) micro-patterns as a function of folding angle. (b) Surface resistance changes of C/PANI:CSA micro-pattern with enhancing of bending cycle.

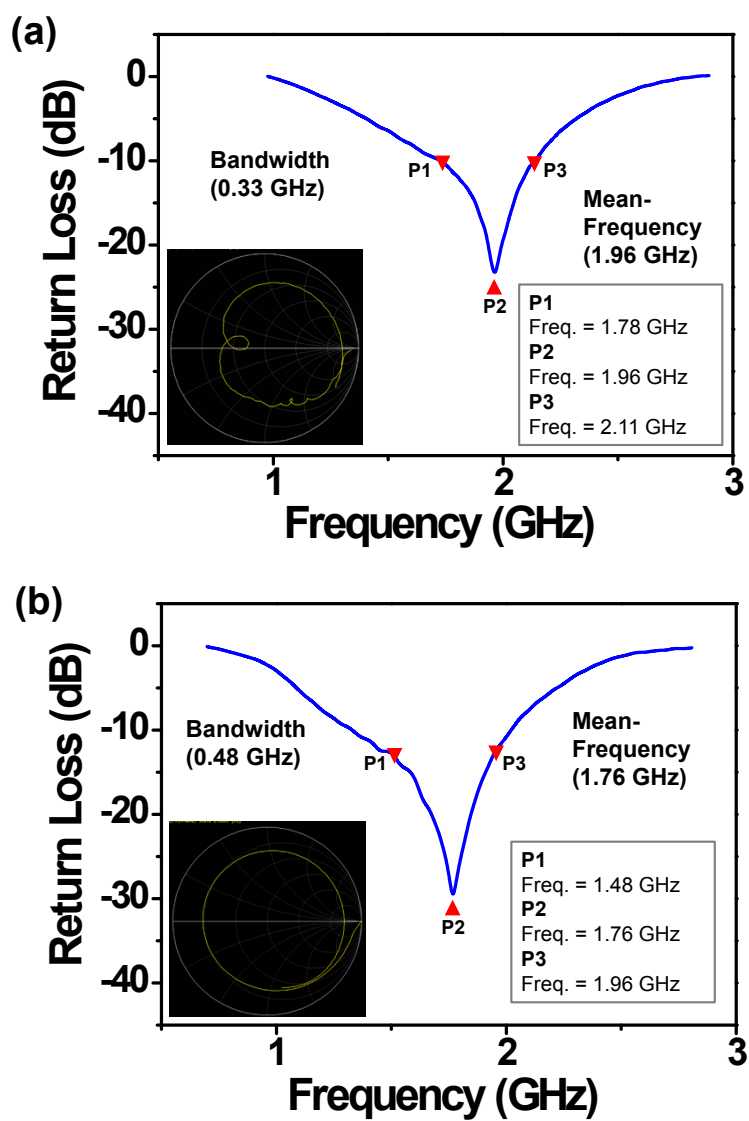

**Figure S3.** Return loss curves and Smith chart impedance diagrams (inset) of dipole tag-antenna using (a) PANI:CSA and (b) C/PANI:CSA-based electrodes.
